# Supplementary material
Source: PubMed Central journal article supplement (PMC5590638)
Supplement: NIHMS900240-supplement-supplement_1.pdf [file NIHMS900240-supplement-supplement_1.pdf]

# **Supplemental Material**

**Supplemental Figures S1-S3**

**Supplemental Tables S1-S8**

## Supplemental Figures S1-S3

**Figure S1.** Kaplan-Meier cumulative incidence plot with follow-up years as the time axis and mortality as the outcome stratified by fifths of baseline uric acid. A logrank test was performed to assess for a trend across quartiles of uric acid. SUA F represents fifths of uric acid.

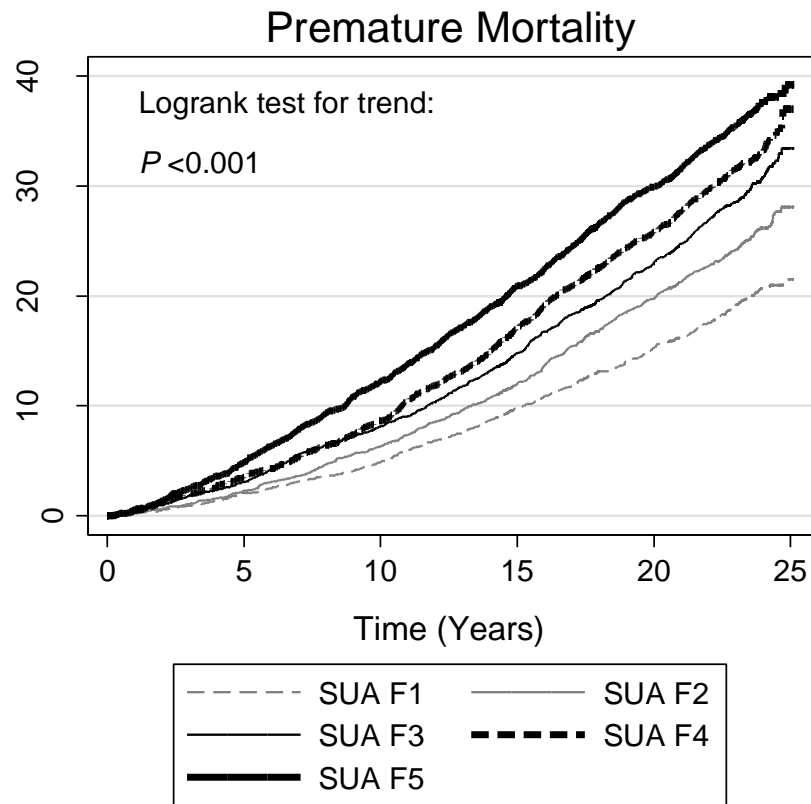

**Figure S2.** Adjusted hazard ratios (solid line) from restricted cubic spline models for mortality stratified by sex using overall fifths of baseline uric acid (**A**) and sex-specific fifths of uric acid (**B**). Men are depicted in black; women are depicted in gray. Shading and dashed lines are the 95% confidence intervals. The models were expressed relative to the 40<sup>th</sup> percentile with knots specified at the 20<sup>th</sup>, 40<sup>th</sup>, 60<sup>th</sup>, and 80<sup>th</sup> percentiles and were adjusted for age, sex, systolic blood pressure, diastolic blood pressure, blood pressure medication use, systolic blood pressure & medication use interaction, smoking status, number of cigarettes per day among smokers, total cholesterol, high density lipoprotein cholesterol, body mass index, baseline diabetes status, daily alcohol use, and the Scottish Index of Multiple Deprivation. The plots were truncated at the 1<sup>st</sup> and 99<sup>th</sup> percentiles. The hazard ratios are shown on a natural log scale. Vertical lines depict women (W) and men (M) cutpoints for hyperuricemia.

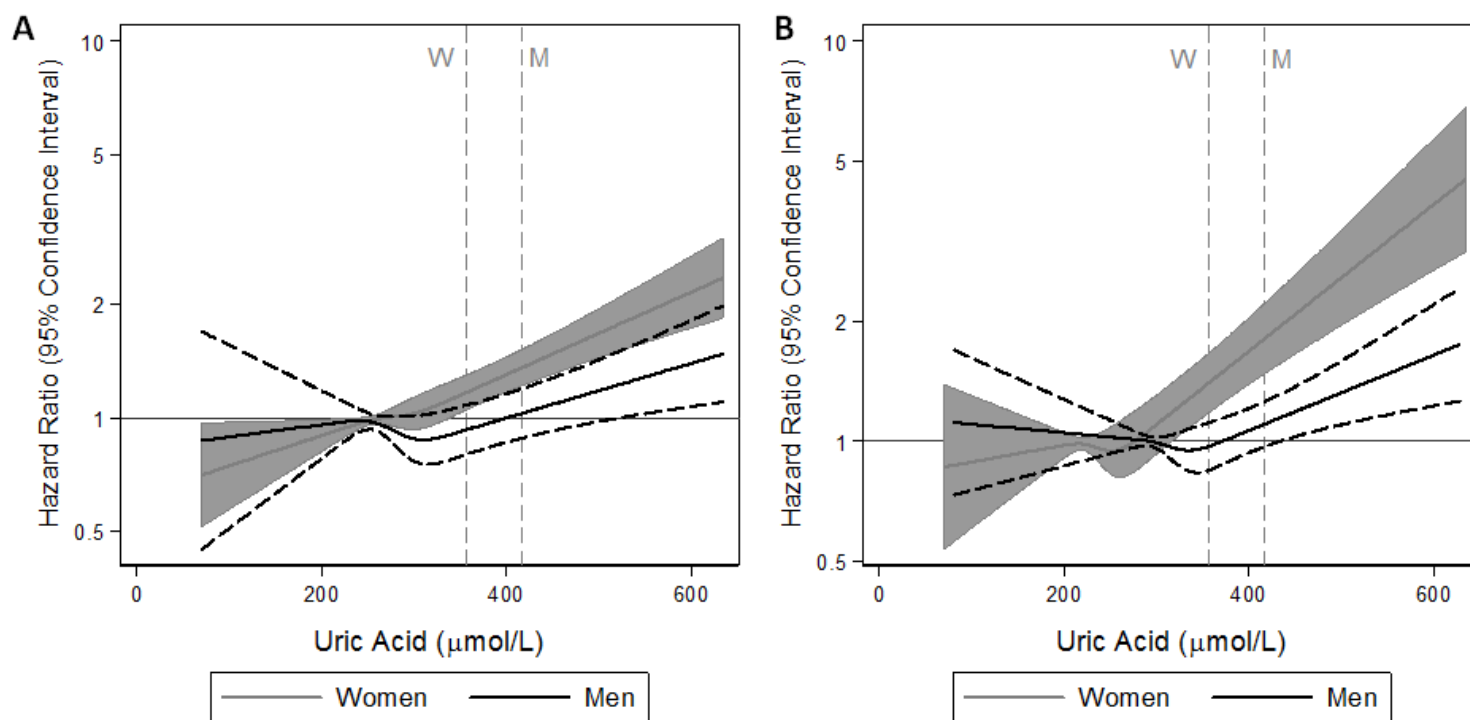

**Figure S3.** Kernel density plots depicting the distribution uric acid by participants who died (solid) versus those who did not die (dash). The distributions were significantly different by two-sample Kolmogorov-Smirnov equality-of-distributions tests ( $P < 0.001$ ).

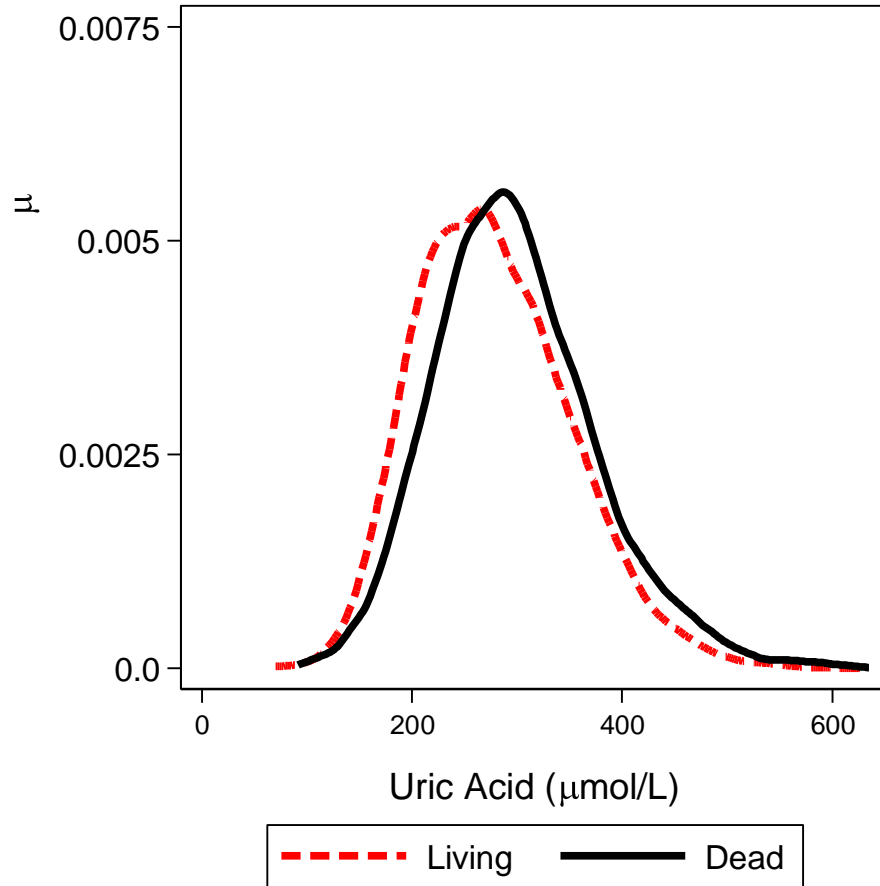

## Supplemental Tables S1-S8

**Supplemental Table S1. Hazard Ratios for all-cause mortality according to categories and continuous uric acid concentrations by strata of participants with baseline hyperuricemia\* versus normouricemia**

|                                                       | Hyperuricemia, N = 1,003 | Normouricemia, N = 14,080 |
|-------------------------------------------------------|--------------------------|---------------------------|
| <b>Uric acid per 100 <math>\mu\text{mol/L}</math></b> | 1.51 (1.23, 1.86)        | 1.02 (0.95, 1.09)         |
| <i>P</i> value                                        | <0.001                   | <0.001                    |

Both models adjusted for age, sex, systolic blood pressure, diastolic blood pressure, blood pressure medication use, systolic blood pressure & medication use interaction, smoking status, number of cigarettes per day among smokers, total cholesterol, high density lipoprotein cholesterol, body mass index, baseline diabetes status, daily alcohol use, and the Scottish Index of Multiple Deprivation

\*Hyperuricemia is defined as a uric acid >416 (7 mg/dL)  $\mu\text{mol/L}$  in men and >357  $\mu\text{mol/L}$  (6 mg/dL) in women; normouricemia is defined as a uric acid  $\leq$ 416  $\mu\text{mol/L}$  in men and  $\leq$ 357  $\mu\text{mol/L}$  in women.

**Supplemental Table S2. Hazard Ratios for mortality according to categories and continuous uric acid concentrations with fifth 1 as reference.**

|                                                          | Hazard Ratio (95% CI) |                   |                   |
|----------------------------------------------------------|-----------------------|-------------------|-------------------|
|                                                          | Model 1               | Model 2           | Model 3           |
| <b>Fifths of uric acid, <math>\mu\text{mol/L}</math></b> |                       |                   |                   |
| 37.88 - 218.53                                           | 1 (reference)         | 1 (reference)     | 1 (reference)     |
| 218.55 - 259.01                                          | 0.99 (0.89, 1.11)     | 0.97 (0.86, 1.08) | 0.97 (0.86, 1.08) |
| 259.01 - 296.53                                          | 1.02 (0.91, 1.14)     | 0.98 (0.88, 1.10) | 0.99 (0.88, 1.11) |
| 296.55 - 344.35                                          | 1.03 (0.92, 1.16)     | 0.99 (0.88, 1.12) | 1.00 (0.89, 1.13) |
| 344.37 - 782.75                                          | 1.19 (1.06, 1.34)     | 1.12 (0.99, 1.27) | 1.14 (1.00, 1.29) |
| <i>P</i> trend across fifths                             | <0.001                | 0.02              | 0.008             |

Model 1: age, sex

Model 2: Model 1 + systolic blood pressure, diastolic blood pressure, blood pressure medication use, systolic blood pressure & medication use interaction, smoking status, number of cigarettes per day among smokers, total cholesterol, high density lipoprotein cholesterol, body mass index, baseline diabetes status, daily alcohol use

Model 3: Model 2 + Scottish Index of Multiple Deprivation

**Supplemental Table S3. Hazard Ratios for mortality according to categories and continuous uric acid concentrations by sex**

|                                                          | Hazard Ratio (95% CI) |                   | <i>P</i> -interaction |
|----------------------------------------------------------|-----------------------|-------------------|-----------------------|
|                                                          | Men, N = 7,559        | Women, N = 7,524  |                       |
| <b>Fifths of uric acid, <math>\mu\text{mol/L}</math></b> |                       |                   |                       |
| 37.88 - 218.53                                           | 1.05 (0.85, 1.30)     | 1.05 (0.91, 1.21) |                       |
| 218.55 - 259.01                                          | 1 (reference)         | 1 (reference)     |                       |
| 259.01 - 296.53                                          | 0.96 (0.83, 1.10)     | 1.09 (0.94, 1.27) | 0.002                 |
| 296.55 - 344.35                                          | 0.91 (0.79, 1.04)     | 1.27 (1.08, 1.50) |                       |
| 344.37 - 782.75                                          | 0.99 (0.86, 1.14)     | 1.69 (1.40, 2.04) |                       |
| <i>P</i> trend across fifths                             | 0.82                  | <0.001            |                       |
| <b>Hyperuricemia</b>                                     | 1.23 (1.07, 1.42)     | 1.68 (1.41, 2.00) | 0.03                  |
| <i>P</i> value                                           | 0.004                 | <0.001            |                       |
| <b>Uric acid per 100 <math>\mu\text{mol/L}</math></b>    | 1.05 (0.98, 1.12)     | 1.29 (1.18, 1.40) | 0.02                  |
| <i>P</i> value                                           | 0.14                  | <0.001            |                       |

All models adjusted for age, sex, systolic blood pressure, diastolic blood pressure, blood pressure medication use, systolic blood pressure & medication use interaction, smoking status, number of cigarettes per day among smokers, total cholesterol, high density lipoprotein cholesterol, body mass index, baseline diabetes status, daily alcohol use, and the Scottish Index of Multiple Deprivation

**Supplemental Table S4. Hazard Ratios for mortality by sex-specific fifths of uric acid (Hazard ratio, 95% CI)**

| <b>Fifths of uric acid, <math>\mu\text{mol/L}</math></b> | <b>Men (N=7,599)</b> |
|----------------------------------------------------------|----------------------|
| 53.98 - 267.24                                           | 1.03 (0.91, 1.16)    |
| 267.26 - 300.89                                          | 1 (reference)        |
| 300.90 - 332.19                                          | 0.93 (0.82, 1.06)    |
| 332.20 - 373.37                                          | 1.00 (0.88, 1.14)    |
| 373.43 - 705.34                                          | 1.05 (0.92, 1.20)    |
| <i>P</i> trend across fifths                             | 0.70                 |

  

| <b>Fifths of uric acid, <math>\mu\text{mol/L}</math></b> | <b>Women (N = 7,524)</b> |
|----------------------------------------------------------|--------------------------|
| 37.88 - 195.29                                           | 0.95 (0.79, 1.14)        |
| 195.30 - 223.86                                          | 1 (reference)            |
| 223.87 - 251.63                                          | 1.02 (0.85, 1.21)        |
| 251.64 - 290.04                                          | 0.98 (0.83, 1.17)        |
| 290.06 - 782.75                                          | 1.31 (1.10, 1.55)        |
| <i>P</i> trend across fifths                             | <0.001                   |

Both models adjusted for age, sex, systolic blood pressure, diastolic blood pressure, blood pressure medication use, systolic blood pressure & medication use interaction, smoking status, number of cigarettes per day among smokers, total cholesterol, high density lipoprotein cholesterol, body mass index, baseline diabetes status, daily alcohol use, and the Scottish Index of Multiple Deprivation



**Supplemental Table S5. Adjusted hazard ratios (95% CI) for cardiovascular conditions present at the time of death according to fifths of uric acid concentration, hyperuricemia, and continuous uric acid concentrations (N=15,083)**

|                                 | <b>Congestive heart failure mortality</b> | <b>Coronary heart disease mortality</b> | <b>Cerebrovascular mortality</b> | <b>Peripheral vascular disease mortality</b> | <b>Thromboembolic mortality</b> |
|---------------------------------|-------------------------------------------|-----------------------------------------|----------------------------------|----------------------------------------------|---------------------------------|
| <b>Fifths of uric acid</b>      |                                           |                                         |                                  |                                              |                                 |
| 37.88 - 218.55                  | 1.29 (0.87, 1.93)                         | 1.20 (0.97, 1.50)                       | 1.11 (0.79, 1.55)                | 2.26 (1.22, 4.20)                            | 0.68 (0.30, 1.56)               |
| 218.56 - 258.97                 | 1 (reference)                             | 1 (reference)                           | 1 (reference)                    | 1 (reference)                                | 1 (reference)                   |
| 259.01 - 296.58                 | 1.17 (0.82, 1.66)                         | 0.94 (0.78, 1.14)                       | 0.96 (0.70, 1.31)                | 2.06 (1.16, 3.63)                            | 0.61 (0.28, 1.32)               |
| 296.59 - 344.41                 | 1.05 (0.74, 1.51)                         | 0.88 (0.73, 1.06)                       | 0.96 (0.70, 1.31)                | 1.82 (1.01, 3.27)                            | 1.13 (0.57, 2.21)               |
| 344.43 - 782.75                 | 1.26 (0.88, 1.80)                         | 0.97 (0.80, 1.17)                       | 1.06 (0.76, 1.47)                | 1.61 (0.86, 3.00)                            | 1.83 (0.94, 3.60)               |
| <i>P</i> trend across fifths    | 0.68                                      | 0.16                                    | 0.99                             | 0.81                                         | 0.008                           |
| <b>Hyperuricemia</b>            | 1.72 (1.27, 2.33)                         | 1.21 (1.01, 1.46)                       | 1.17 (0.83, 1.65)                | 1.25 (0.72, 2.20)                            | 1.81 (0.95, 3.45)               |
| <i>P</i> value                  | 0.001                                     | 0.04                                    | 0.36                             | 0.43                                         | 0.07                            |
| <b>Uric acid per 100 µmol/L</b> | 1.20 (1.02, 1.41)                         | 0.99 (0.91, 1.09)                       | 1.03 (0.88, 1.21)                | 1.10 (0.85, 1.41)                            | 1.61 (1.17, 2.23)               |
| <i>P</i> value                  | 0.03                                      | 0.87                                    | 0.71                             | 0.48                                         | 0.004                           |

All models adjusted for age, sex, systolic blood pressure, diastolic blood pressure, blood pressure medication use, systolic blood pressure & medication use interaction, smoking status, number of cigarettes per day among smokers, total cholesterol, high density lipoprotein cholesterol, body mass index, baseline diabetes status, daily alcohol use, and the Scottish Index of Multiple Deprivation

**Table S6. Primary cause of death**

|                                 | All Deaths |             | Normouricemia |             | Hyperuricemia |             | P-value* |
|---------------------------------|------------|-------------|---------------|-------------|---------------|-------------|----------|
|                                 | N          | % of deaths | N             | % of deaths | N             | % of deaths |          |
| Mortality from any cause        | 3,980      | 100.0       | 3,580         | 89.9        | 400           | 10.1        | <0.001   |
| Acute CHD                       | 597        | 15.0        | 536           | 15.0        | 61            | 15.3        | 0.89     |
| Chronic CHD                     | 315        | 7.9         | 275           | 7.7         | 40            | 10.0        | 0.17     |
| Acute stroke                    | 216        | 5.4         | 199           | 5.6         | 17            | 4.3         | 0.79     |
| Chronic cerebrovascular disease | 71         | 1.8         | 59            | 1.7         | 12            | 3.0         | 0.02     |
| Other cardiovascular            | 238        | 6.0         | 199           | 5.6         | 39            | 9.8         | <0.001   |
| Respiratory                     | 389        | 9.8         | 351           | 9.8         | 38            | 9.5         | 0.01     |
| Cancer                          | 1,513      | 38.0        | 1,397         | 39.0        | 116           | 29.0        | 0.07     |
| Other causes                    | 641        | 16.1        | 564           | 15.8        | 77            | 19.3        | <0.001   |

Abbreviations: CHD, coronary heart disease

\*P-value for the hazard ratio comparing hyperuricemia with normouricemia with cause-specific mortality after adjustment for age, sex, systolic blood pressure, diastolic blood pressure, blood pressure medication use, systolic blood pressure & medication use interaction, smoking status, number of cigarettes per day among smokers, total cholesterol, high density lipoprotein cholesterol, body mass index, baseline diabetes status, daily alcohol use, and the Scottish Index of Multiple Deprivation

**Table S7. Hazard Ratios (95% CI) for specific causes of mortality according to categories and continuous uric acid concentrations with adjustment for estimated glomerular filtration rate, N = 12,611**

|                                 | <b>Mortality from Any Cause</b> | <b>Cardiovascular Mortality</b> | <b>Cancer-related Mortality</b> | <b>Kidney-related Mortality</b> |
|---------------------------------|---------------------------------|---------------------------------|---------------------------------|---------------------------------|
| <b>Fifths of uric acid</b>      |                                 |                                 |                                 |                                 |
| 37.88 - 218.55                  | 1.07 (0.95, 1.21)               | 1.14 (0.95, 1.37)               | 0.97 (0.80, 1.16)               | 0.76 (0.39, 1.47)               |
| 218.56 - 258.97                 | 1.00 (1.00, 1.00)               | 1.0 (reference)                 | 1.00 (1.00, 1.00)               | 1.00 (1.00, 1.00)               |
| 259.01 - 296.58                 | 1.06 (0.94, 1.18)               | 0.93 (0.79, 1.09)               | 1.04 (0.88, 1.23)               | 1.28 (0.77, 2.14)               |
| 296.59 - 344.41                 | 1.13 (1.00, 1.26)               | 0.99 (0.84, 1.17)               | 0.96 (0.80, 1.15)               | 1.27 (0.75, 2.17)               |
| 344.43 - 782.75                 | 1.28 (1.13, 1.45)               | 1.15 (0.97, 1.36)               | 1.16 (0.96, 1.40)               | 1.62 (0.95, 2.77)               |
| <i>P</i> trend across fifths    | <0.001                          | 0.32                            | 0.15                            | 0.03                            |
| <b>Hyperuricemia</b>            | 1.48 (1.31, 1.68)<br><0.001     | 1.47 (1.25, 1.74)<br><0.001     | 1.38 (1.11, 1.70)<br>0.003      | 2.52 (1.67, 3.81)<br><0.001     |
| <b>Uric acid per 100 µmol/L</b> | 1.18 (1.11, 1.25)<br><0.001     | 1.13 (1.04, 1.23)<br>0.004      | 1.12 (1.02, 1.23)<br>0.02       | 1.55 (1.21, 1.97)<br><0.001     |

All models adjusted for age, sex, systolic blood pressure, diastolic blood pressure, blood pressure medication use, systolic blood pressure & medication use interaction, smoking status, number of cigarettes per day among smokers, total cholesterol, high density lipoprotein cholesterol, body mass index, baseline diabetes status, daily alcohol use, estimated glomerular filtration rate, and the Scottish Index of Multiple Deprivation

**Table S8. Cardiovascular conditions present at the time of death (Hazard Ratio,95% CI) with adjustment for estimated glomerular filtration rate, N = 12,611**

|                                 | <b>Congestive heart failure mortality</b> | <b>Coronary heart disease mortality</b> | <b>Cerebrovascular mortality</b> | <b>Peripheral vascular disease mortality</b> | <b>Thromboembolic mortality</b> |
|---------------------------------|-------------------------------------------|-----------------------------------------|----------------------------------|----------------------------------------------|---------------------------------|
| <b>Fifths of uric acid</b>      |                                           |                                         |                                  |                                              |                                 |
| 37.88 - 218.55                  | 1.35 (0.88, 2.08)                         | 1.26 (0.99, 1.59)                       | 1.28 (0.88, 1.87)                | 1.84 (0.94, 3.58)                            | 0.63 (0.25, 1.59)               |
| 218.56 - 258.97                 | 1.0 (reference)                           | 1.0 (reference)                         | 1.00 (1.00, 1.00)                | 1.00 (1.00, 1.00)                            | 1.00 (1.00, 1.00)               |
| 259.01 - 296.58                 | 1.09 (0.73, 1.61)                         | 0.96 (0.77, 1.18)                       | 0.96 (0.67, 1.37)                | 1.81 (0.99, 3.30)                            | 0.48 (0.19, 1.21)               |
| 296.59 - 344.41                 | 1.07 (0.72, 1.60)                         | 0.96 (0.78, 1.18)                       | 1.03 (0.72, 1.48)                | 1.64 (0.87, 3.09)                            | 1.25 (0.59, 2.64)               |
| 344.43 - 782.75                 | 1.13 (0.75, 1.72)                         | 1.02 (0.82, 1.27)                       | 1.15 (0.79, 1.68)                | 1.48 (0.75, 2.93)                            | 1.99 (0.93, 4.26)               |
| <i>P</i> trend across fifths    | 0.80                                      | 0.36                                    | 0.99                             | 1.00                                         | 0.006                           |
| <b>Hyperuricemia</b>            | 1.63 (1.11, 2.38)                         | 1.25 (1.01, 1.55)                       | 1.32 (0.89, 1.96)                | 0.96 (0.47, 1.96)                            | 2.10 (1.00, 4.39)               |
| <i>P</i> value                  | 0.01                                      | 0.04                                    | 0.17                             | 0.91                                         | 0.05                            |
| <b>Uric acid per 100 µmol/L</b> | 1.16 (0.95, 1.42)                         | 1.02 (0.92, 1.14)                       | 1.04 (0.86, 1.26)                | 0.97 (0.71, 1.32)                            | 1.79 (1.23, 2.62)               |
| <i>P</i> value                  | 0.14                                      | 0.66                                    | 0.68                             | 0.86                                         | 0.003                           |

All models adjusted for age, sex, systolic blood pressure, diastolic blood pressure, blood pressure medication use, systolic blood pressure & medication use interaction, smoking status, number of cigarettes per day among smokers, total cholesterol, high density lipoprotein cholesterol, body mass index, baseline diabetes status, daily alcohol use, estimated glomerular filtration rate, and the Scottish Index of Multiple Deprivation
